# Supplementary material for: Supports and Barriers to Lifestyle Interventions in Women with Gestational Diabetes Mellitus in Australia: A National Online Survey
Source: MDPI journal article supplement (doi:10.3390/nu15030487), 2023-01-17
Supplement: s1 [file s1]

**Table S1.** Respondent demographic, employment, and educational characteristics.

|                           |           |               |               |                   |                 |                 |       |       |       |
|---------------------------|-----------|---------------|---------------|-------------------|-----------------|-----------------|-------|-------|-------|
| Age (Years)               | <20       | 20–24         | 25–29         | 30–34             | 35–39           | >40             | Total |       |       |
| Number                    | 0         | 12            | 63            | 194               | 200             | 95              | 564   |       |       |
| %                         | 0         | 2.1           | 11.2          | 34.4              | 35.5            | 16.8            |       |       |       |
| Pregravid BMI*            | <25 kg/m² | 25–29.9 kg/m² | 30–34.9 kg/m² | 35–39.9 kg/m²     | >40 kg/m²       |                 |       |       |       |
| Number                    | 29        | 35            | 31            | 28                | 15              | 138             |       |       |       |
| %                         | 21.0      | 25.4          | 22.5          | 20.3              | 10.9            |                 |       |       |       |
| Current non-pregnant BMI† | <25 kg/m² | 25–29.9 kg/m² | 30–34.9 kg/m² | 35–39.9 kg/m²     | >40 kg/m²       |                 |       |       |       |
| Number                    | 82        | 116           | 123           | 49                | 53              | 423             |       |       |       |
| %                         | 19.4      | 27.4          | 29.1          | 11.6              | 12.5            |                 |       |       |       |
| State                     | VIC       | QLD           | SA            | WA                | NSW             | NT              | ACT   | PNA   | Total |
| Number                    | 24        | 30            | 112           | 168               | 161             | 1               | 64    | 2     | 562   |
| %                         | 4.3       | 5.3           | 19.9          | 29.9              | 28.6            | 0.2             | 11.4  | 0.4   |       |
| Marital Status            | De facto  | Divorced      | Married       | NM                | Separated       | Widowed         | PNA   | Total |       |
| Number                    | 142       | 10            | 366           | 13                | 21              | 1               | 10    | 563   |       |
| %                         | 25.5      | 1.8           | 65.0          | 2.3               | 3.7             | 0.2             | 1.8   |       |       |
| Employment                | FT        | PT            | Casual        | FT carer          | Not working     | ML              | PNA   | Other | Total |
| Number                    | 146       | 147           | 23            | 17                | 71              | 125             | 11    | 11    | 551   |
| %                         | 26.5      | 26.7          | 4.2           | 3.1               | 12.9            | 22.7            | 2.0   | 2.0   |       |
| Education                 | <HS       | HS            | TAFE/ College | Bachelor’s degree | Master’s degree | Doctoral Degree | Total |       |       |
| Number                    | 19        | 64            | 152           | 235               | 74              | 16              | 560   |       |       |
| %                         | 3.4       | 11.4          | 27.1          | 42.0              | 13.2            | 2.9             |       |       |       |
| Time since GDM diagnosis  | <1 year   | 2–4 years     |               | 5–7 years         |                 | > 8 years       |       | Total |       |
| Number                    | 164       | 173           |               | 39                |                 | 34              |       | 410   |       |
| %                         | 40.0      | 40.2          |               | 9.5               |                 | 8.3             |       |       |       |
| Children                  | 0         | 1             | 2             | 3                 | ≥4              | Total           |       |       |       |
| Number                    | 46        | 217           | 189           | 63                | 26              | 541             |       |       |       |
| %                         | 8.5       | 40.1          | 34.9          | 11.6              | 4.8             |                 |       |       |       |

\* Data for women who were pregnant at the time of completing the survey. † Data for women who were not pregnant at time of completing survey. BMI, body mass index; VIC, Victoria; QLD, Queensland; SA, South Australia; WA, Western Australia; NSW, New South Wales; NT, Northern Territory; ACT, Australian Capital Territory; PNA, prefer not to answer; NM, not married; FT, full-time; PT, part-time; ML, maternity leave; HS, high school; GDM, gestational diabetes mellitus.
